# Supplementary material
Source: ML conference proceedings conference paper supplement (https://proceedings.neurips.cc/paper_files/paper/2018/hash/81448138f5f163ccdba4acc69819f280-Abstract.html)
Supplement: Supplementary file [file 81448138f5f163ccdba4acc69819f280-Supplemental.zip]

## A Details about Neighborhood Batch Sampling

In this section, we cover more details in regard to Neighborhood Batch Sampling (NBS). We have considered two instantiations of the translation mapping  $R$  and similarity scores  $\alpha$ , based on hard  $k$ -nearest neighbor search and soft selection, respectively. Given a novel class  $y_n$ , we want to select the base classes  $\{y_b\}$  that are semantically similar to the  $y_n$  query.

**Hard assignments (NBS-H)** This sampling method retrieves  $k$  uniformly weighted nearest base classes. NBS-H can be formulated as follows,

$$R(y_n) = \arg \min_{\mathcal{Y}'_b \subset \mathcal{Y}_b, |\mathcal{Y}'_b|=k} \sum_{y_b \in \mathcal{Y}'_b} \|\mathbf{l}_{y_b} - \mathbf{l}_{y_n}\|_2^2, \quad \alpha(y_b, y_n) = \frac{1}{k} \forall y_b \in R(y_n). \quad (11)$$

Similar heuristics are used in previous works [11, 12] as well by introducing a new hyper-parameter  $k$ . Though NBS-H may save computational resources, in practice, we find it too sensitive to the selection of  $k$ . In addition to that, it treats all selected base classes as equally related to the target novel class  $y_n$ , which slows the convergence and hurts the performance.

**Soft assignments (NBS-S)** In this case, all base classes are considered, and weighted by the softmax score over the learned metrics,

$$R(y_n) = \mathcal{Y}_b, \quad \alpha(y_b, y_n) = \frac{\exp(-\|\mathbf{l}_{y_b} - \mathbf{l}_{y_n}\|_2^2)}{\sum_{y'_b \in \mathcal{Y}_b} \exp(-\|\mathbf{l}_{y'_b} - \mathbf{l}_{y_n}\|_2^2)}. \quad (12)$$

Through the ablation study, we showed that this batch sampling technique is more effective than NBS-H given enough computational resources.

## B Details about Intermediate GAN Objectives

In this section, we formulate our full objectives for intermediate variants derived for the imbalanced set-to-set translation.

**c-GAN** Its full objective could be defined as a basic minimax game,

$$G_n^* = \arg \min_{G_n} \max_{D_n} \mathcal{L}_{\text{adv}}(G_n, D_n, \mathcal{B}, \mathcal{N}). \quad (13)$$

**cCyc-GAN** Accordingly, its full objective can be directly derived from cycle-consistency,

$$G_n^* = \arg \min_{G_n, G_b} \max_{D_n, D_b} \mathcal{L}_{\text{adv}}(G_n, D_n, \mathcal{B}, \mathcal{N}) + \mathcal{L}_{\text{adv}}(G_b, D_b, \mathcal{N}, \mathcal{B}) + \lambda_{\text{cyc}} \mathcal{L}_{\text{cyc}}(G_n, G_b). \quad (14)$$

## C Details about Computing Subgradient of Ky Fan $m$ -norm

**Theorem 1** Given a matrix  $\mathbf{X}$  and its Ky Fan  $m$ -norm  $\|\mathbf{X}\|_m = \sum_i \sigma_i(\tilde{\mathbf{X}})$  where  $\tilde{\mathbf{X}} = \mathbf{U}\Sigma\mathbf{V}^T$  is the  $m$ -truncated SVD and  $\sigma_i(\cdot)$  is the  $i$ -th largest singular value, we have,

$$\frac{d\|\mathbf{X}\|_m}{d\mathbf{X}} = \mathbf{U}\mathbf{V}^T \quad (15)$$

**Proof** Rewrite Ky Fan  $m$ -norm by its sub-differential set,

$$\|\mathbf{X}\|_m = \text{tr}(\Sigma) = \text{tr}(\Sigma\Sigma^{-1}\Sigma) \quad (16)$$

Then,

$$d\|\mathbf{X}\|_m = \text{tr}(\Sigma\Sigma^{-1}d\Sigma) \quad (17)$$

Since we have,

$$d\mathbf{X} = d\mathbf{U}\mathbf{\Sigma}\mathbf{V}^T + \mathbf{U}d\mathbf{\Sigma}\mathbf{V}^T + \mathbf{U}\mathbf{\Sigma}d\mathbf{V}^T \quad (18)$$

Therefore,

$$\begin{aligned} \mathbf{U}d\mathbf{\Sigma}\mathbf{V}^T &= d\mathbf{X} - d\mathbf{U}\mathbf{\Sigma}\mathbf{V}^T - \mathbf{U}\mathbf{\Sigma}d\mathbf{V}^T \\ \Rightarrow d\mathbf{\Sigma} &= \mathbf{U}^T d\mathbf{X}\mathbf{V} - \mathbf{U}^T d\mathbf{U}\mathbf{\Sigma} - \mathbf{\Sigma}d\mathbf{V}^T\mathbf{V} \end{aligned} \quad (19)$$

By the diagonality of  $\mathbf{\Sigma}$  and anti-symmetricity of  $\mathbf{U}$ ,  $\mathbf{V}$ ,

$$\begin{aligned} \mathbf{U}^T d\mathbf{U}\mathbf{\Sigma} + \mathbf{\Sigma}d\mathbf{V}^T\mathbf{V} &= 0 \\ \Rightarrow d\mathbf{\Sigma} &= \mathbf{U}^T d\mathbf{X}\mathbf{V} \end{aligned} \quad (20)$$

Substitute it into Equation 17,

$$\begin{aligned} d\|[\mathbf{X}]_m\|_* &= \text{tr}(\mathbf{\Sigma}\mathbf{\Sigma}^{-1}d\mathbf{\Sigma}) = \text{tr}(\mathbf{U}^T d\mathbf{X}\mathbf{V}) = \text{tr}(\mathbf{U}^T\mathbf{V}d\mathbf{X}) \\ \Rightarrow \frac{d\|[\mathbf{X}]_m\|_*}{d\mathbf{X}} &= \mathbf{U}\mathbf{V}^T \end{aligned} \quad (21)$$

□
